## Review Article

# Atypical RhoUV GTPases in development and disease

 **Stephanie Woo<sup>1,2</sup> and Leesa Strasser<sup>1,2</sup>**

<sup>1</sup>Department of Molecular Cell Biology, University of California, Merced, CA, U.S.A.; <sup>2</sup>Quantitative and Systems Biology Graduate Program, University of California, Merced, CA, U.S.A.

**Correspondence:** Stephanie Woo (swoo6@ucmerced.edu)

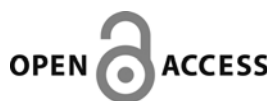

RhoU and RhoV are members of the Rho family of small GTPases that comprise their own subfamily. RhoUV GTPases are classified as atypical due to the kinetics of their GTP/GDP binding cycles. They also possess unique N- and C-termini that regulate their subcellular localization and activity. RhoU and RhoV have been linked to cytoskeletal regulation, cell adhesion, and cell migration. They each exhibit distinct expression patterns during embryonic development and diseases such as cancer metastasis, suggesting they have specialized functions. In this review, we will discuss the known functions of RhoU and RhoV, with a focus on their roles in early development, organogenesis, and disease.

## Introduction

### Regulation of Rho GTPases

The Rho family GTPases are essential regulators of many cellular processes including cytoskeletal dynamics, cell migration, cell adhesion, proliferation, and apoptosis [1]. Rho proteins are part of the larger Ras superfamily of small G proteins and are distinguished by a Rho-specific insert within their GTPase domain [2]. Like all G proteins, Rho GTPases act as molecular switches that cycle between an active GTP-bound state and an inactive GDP-bound state. In the active state, Rho proteins undergo a conformational shift to allow specific effectors to bind, activating downstream signals for various cell processes [3]. Cycling between the active, GTP-bound state and the inactive, GDP-bound state is facilitated by a large number of regulatory proteins. Guanine nucleotide exchange factors (GEFs) activate Rho GTPases by promoting the exchange of GDP for GTP [4]. GTPase-activating proteins (GAPs) inactivate Rho proteins by accelerating their intrinsic GTP hydrolysis activity [5].

In addition to the nucleotide-binding state, Rho GTPases are also regulated by subcellular localization. Rho proteins are post-translationally lipid modified on their C-terminal ends, primarily via prenylation, which enables localization to cell membranes where activating GEFs and downstream effectors are located [6]. A class of regulatory proteins called Guanine dissociation inhibitors (GDIs) can bind and mask these lipid modifications, sequestering the Rho proteins in the cytoplasm and preventing non-specific activation by membrane-localized GEFs [7]. In addition, GDI binding prevents nucleotide exchange, which locks the Rho protein in an inactivated state [8,9]. Thus, GDIs function to maintain a constant cytoplasmic pool of inactivated Rho GTPases poised for rapid activation [7]. However, GDIs have also been demonstrated to actively extract Rho GTPases from cell membranes [9,10], suggesting that GDIs may function beyond just passive sequestration.

### Structure and function of RhoU and RhoV

In mammals, there are 20 Rho family members of which the most extensively characterized are RhoA, Rac1, and Cdc42 — the so-called ‘classical’ Rho GTPases [1]. Rho family members are grouped into different subfamilies based on amino acid sequence homology [11]. The RhoUV subfamily is composed of RhoU, also known as Wnt-1 responsive Cdc42 homolog (Wrch1), and RhoV, also known as

Received: 24 October 2023  
 Revised: 23 January 2024  
 Accepted: 24 January 2024

Version of Record published:  
 5 February 2024

Cdc42 homologous protein (Chp) or Wrch2 [12]. This subfamily has been proposed to be derived from Cdc42 [11]. RhoU shares 57% sequence homology to Cdc42 [13] while RhoV is 52% homologous to Cdc42 [14]. Both RhoU and RhoV are structured similarly (Figure 1). They consist of a central G domain that is mostly conserved with other Rho GTPases, but their N- and C-terminal ends significantly diverge from classical Rho GTPases. The N-terminus contains a polyproline domain that can bind SH3 domain-containing adaptor proteins [13–17], while the C-terminus contains unique sequences that direct subcellular localization (discussed below).

Compared with classical Rho GTPases, RhoU and RhoV exhibit elevated rates of GDP/GTP exchange [15,16]. This difference in nucleotide cycling may be due to a key amino acid residue within the nucleotide-binding site (Figure 1). Classical Rho GTPases contain a phenylalanine at position 28 (F28), but RhoU and other ‘atypical’ Rho GTPases contain a tyrosine at this same position [18]. This residue difference is reminiscent of the ‘fast cycling’ F28L H-Ras mutants, which exhibit a high rate of GDP/GTP exchange and can function as constitutively active mutants [19]. Thus, RhoUV proteins are also assumed to predominantly exist in an activated state [12].

Regulation of membrane localization also differs between RhoUV and classical Rho GTPases. Rho UV proteins have been shown to localize to both the plasma membrane and endosome compartments [20–22]. This membrane localization is dependent on posttranslational lipid modification of their C-terminal ends, as with other small G proteins (Figure 1). However, unlike classical Rho GTPases, RhoU and RhoV are palmitoylated rather than prenylated [20,21,23], which is notable as palmitoylation is a reversible process while prenylation is not. Moreover, RhoUV proteins have additional C-terminal sequences besides the palmitoylation motif that also function in membrane localization [22,23].

Together, the unique features of RhoUV GTPases in terms of nucleotide cycling and membrane localization have led to the suggestion that RhoUV proteins are primarily regulated by their subcellular localization rather than by control of nucleotide-binding state by GEFs or GAPs [20,21]. Consistent with this idea, RhoV’s ability

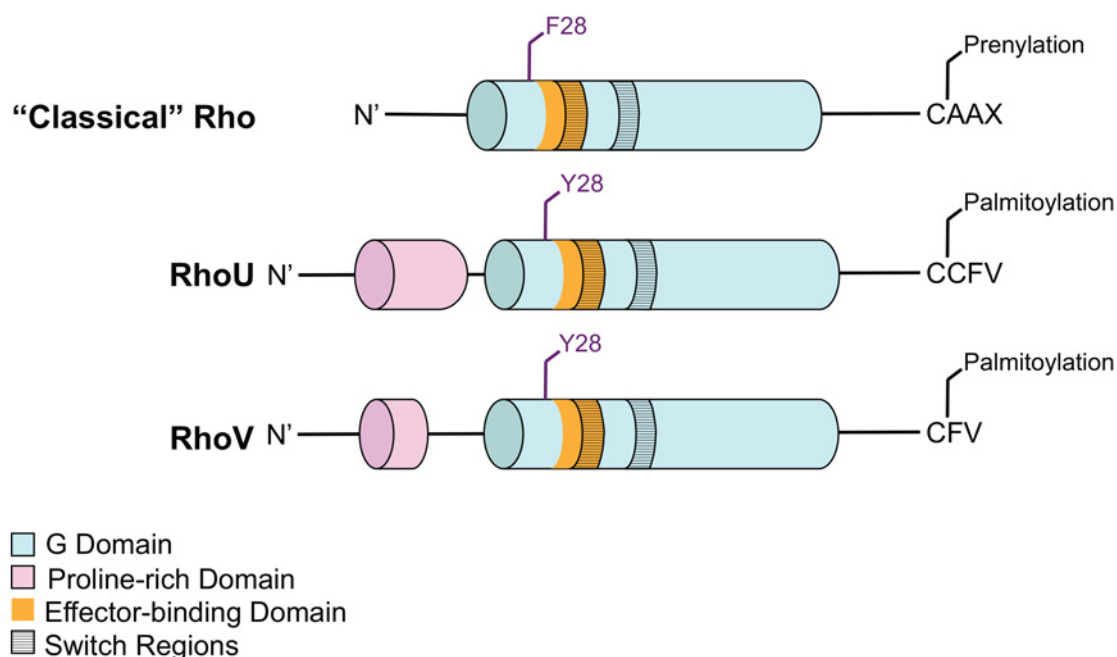

**Figure 1. Domain structures of RhoU and RhoV.**

RhoU and RhoV have several distinct features compared with the ‘classical’ Rho GTPases. The N-terminus is expanded and contains a proline-rich domain (pink). The central G domain (blue) is mostly conserved except for a tyrosine residue at position 28 (Y28) instead of a phenylalanine (F28), which may underlie their rapid GDP/GTP cycling. At the C-terminal end, RhoU and RhoV proteins do not have a canonical CAAX sequence for prenylation. Instead, RhoU and RhoV are reversibly palmitoylated, for which there is no consensus sequence.

to induce lamellipodia and localize to the Golgi apparatus was shown to require its C-terminal domain, which includes the residues and motifs necessary for membrane localization [14]. In addition, RhoGDI-3 was shown to regulate of RhoV activity by chaperoning RhoV to different cellular compartments [24]. On the other hand, both RhoU and RhoV have been shown to interact with  $\beta$ -PIX [25,26], a known Rho GEF [27]. Thus, additional work is likely needed to fully understand how RhoUV GTPases are regulated in cells.

## Downstream effectors RhoUV proteins

RhoUV proteins have been implicated in many different cellular processes including cell adhesion, migration, polarity, proliferation and survival, and gene expression [12]. Several effectors have been identified that mediate these processes downstream of RhoU and RhoV (Figure 2). Many of these effectors belong to the p21-activated kinase (PAK) family of serine/threonine kinases including PAK1 [28,29], PAK2 [14], PAK4 [28,30], and PAK6 [31].

PAK1 is known to regulate cell adhesion by forming a multiprotein complex with the GEF  $\beta$ -PIX and the focal adhesion protein paxillin [27], so not unexpectedly, a major outcome of RhoUV-PAK signaling appears to be the regulation of cell adhesion. In zebrafish embryos, both RhoV and RhoU were shown to interact with both PAK1 and  $\beta$ -PIX to control cell adhesion [25,26]. RhoU was shown to regulate paxillin phosphorylation and focal adhesion dynamics via PAK4 in breast cancer cells [30]. Furthermore, RhoU was reported to localize to osteoclast podosomes and to focal adhesions in HeLa cells and fibroblasts, and localization to adhesive structures required the PAK-binding effector loop and C-terminal extension of RhoU [32].

PAK activation downstream of RhoUV can also regulate cytoskeletal dynamics and actin-driven protrusion. PAK2 binding to RhoV was suggested to induce lamellipodial protrusion [14], and RhoU signaling through PAK1 and Jun kinase 1 (JNK1) could induce actin rearrangements and filopodia formation [13]. The JNK pathway was also linked to RhoV and PAK6 during the induction of apoptosis in PC12 and HEK298 cells [33].

RhoUV proteins have also been linked to growth factor receptor tyrosine kinase signaling, primarily through the N-terminal SH3-binding domain. In breast cancer cells, RhoV was shown to directly bind to Grb2, an SH3 domain-containing adapter protein that functions downstream of the epidermal growth factor receptor (EGFR) [34]. Disrupting the binding between RhoV and Grb2 inhibited EGF-dependent migration. RhoU has also been linked to EGRFR signaling through Grb2, which was shown to activate JNK/AP1-dependent transcription and cell motility [17].

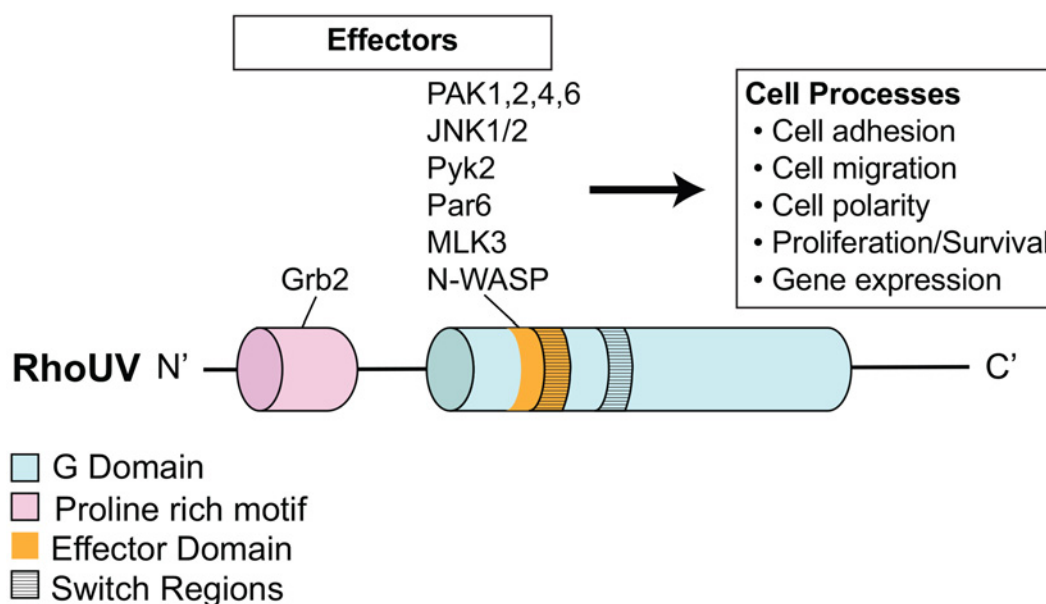

**Figure 2. Downstream effectors and cellular processes regulated by Rho UV GTPases.**

SH3 domain-containing effectors such as Grb2 bind to the polypyrroline-rich domain (pink) at the N-terminus, while most other effectors are presumed to bind to the centrally located effector-binding domain (orange).

Other known effectors of RhoU include the protein tyrosine kinase Pyk2, which promoted filopodia formation [35], and the cell polarity protein Par6, which facilitated tight junction formation in epithelial cells [36]. Other potential RhoV effectors include N-WASP, MLK3, and Par6 [28]; however, these effector candidates were identified by immunoprecipitation, and the functional significance of these interactions has not been demonstrated.

## RhoU and RhoV in development

### Early development

Both RhoU and RhoV have been reported to be expressed in several vertebrate embryos at very early developmental stages, i.e. prior to organogenesis. In chick embryos, *cRhoV* and *cRhoU* are expressed in the primitive streak and Hensen's node at Hamburger–Hamilton (HH) stage 5, with *cRhoU* also present in the prospective anterior neural plate [37]. In *Xenopus* embryos, both RhoU and RhoV expressions are observed in the early gastrula — RhoU is expressed within the dorsal marginal zone, neural plate border, and pharyngeal arches [38,39] while RhoV is expressed in the dorsal marginal zone and within involuting mesodermal cells [40].

In zebrafish embryos, *rhov* expression was reported to begin as early as 5 h post-fertilization (hpf) [25]. Knockdown of *rhov* blocked the ability of embryos to undergo epiboly — the process by which blastomeres spread over and eventually cover the yolk. These epiboly defects were shown to be due primarily to mislocalization of E-cadherin and  $\beta$ -catenin away from adherens junctions via a mechanism that also required  $\beta$ -PIX and PAK1.

The Wnt signaling pathway is known to be very active during development and is involved in early symmetry breaking and axis specification events [41]. Although a role for RhoUV proteins has not yet been reported for these early developmental processes, RhoU and RhoV are known to respond to Wnt signaling. RhoU was initially identified as a Wnt-responsive factor [13]. In mouse embryo fibroblasts, RhoU was shown to be transcriptionally regulated by Wnt-1 in a  $\beta$ -catenin-independent, JNK-dependent manner [42]. And in *Caenorhabditis elegans*, loss of the RhoU/V ortholog CHW-1 resulted in uniform distribution of Wnt receptors in vulval precursor cells, leading to an inability to establish apicobasal polarity [43].

### Heart development

A study in zebrafish embryos has suggested a role for RhoU in cardiac development [26]. Due to a genome duplication event, zebrafish possess two RhoU genes, *rhousa* and *rhoub*. Expression of *rhousa* was detected in the developing heart tube by 36 hpf; expression then became progressively restricted to the atrioventricular canal between 48 and 72 hpf. Knockdown of *rhousa* resulted in abnormalities in the atrioventricular canal and aberrant cardiac looping. *rhousa*-deficient cardiomyocytes also exhibited reduced expression and mislocalization of the adhesion proteins N-cadherin and Alcam, which depended on *pak1* and *arhgef7b*, the zebrafish homolog of  $\beta$ -PIX.

### Gastrointestinal development

Multiple reports have suggested a role for RhoU and RhoV in the development of the gastrointestinal system. In gastrointestinal organs, the inner epithelial layers are derived from the endoderm while the surrounding smooth muscle is derived from the mesoderm. In chick embryos, *cRhoV* was found to be expressed in the endoderm-derived layers of the foregut, caudal hindgut, gizzard, and cloaca while *cRhoU* was broadly expressed throughout the mesoderm-derived layers of the GI tract except for the colon [37].

In mouse embryos, *RhoU* is expressed in the foregut epithelium during early somite stages, and its expression decreases once the epithelium develops into multiple layers [44]. Knockdown of *Rhou* in embryonic stem (ES) cells resulted in decreased expression of endoderm markers, indicating that RhoU facilitates endoderm differentiation. Mouse embryos produced from these *Rhou*-deficient ES cells exhibited a collapsed foregut and irregular thickness of the epithelium. Additionally, these *Rhou*-deficient mice exhibited decreased F-actin and  $\alpha$ -tubulin levels within the apical domain of these epithelial cells. Interestingly, this study did not observe any defects in apicobasal polarity or Cadherin localization, in contrast with what was observed in zebrafish [25,26].

### Neural crest cells

Neural crest cells are a population of multipotent stem cells that arise from the dorsal neural tube at the boundary between the neural and nonneural ectoderm. During development, the neural crest cells undergo an

epithelial-to-mesenchymal transition (EMT) to migrate out of the neural tube and into several locations within the embryo as they differentiate into a wide variety of cell types [45]. Evidence suggests that RhoU regulates the migration of neural crest cells. In both chick and *Xenopus* embryos, RhoU is expressed in migrating neural crest cells [37,39]. Overexpression of RhoU in *Xenopus* neural crest cells promoted extensive lamellipodial protrusions, and both overexpression and knockdown of RhoU inhibited proper cranial neural crest migration [39], suggesting that balanced levels of RhoU activity are required for optimal migration behavior.

Rather than regulating cell migration, RhoV may act to promote neural crest fate specification. In chick embryos, cRhoV expression in the neural folds resembles that of Wnt6 [37], a known neural crest inducer [46]. In *Xenopus* embryos, RhoV is initially expressed in the neural crest progenitor domain, but its expression decreases once neural crest cells start migrating [40]. Overexpression of RhoV led to an expansion of neural crest progenitors while loss of RhoV reduced expression of neural crest marker genes Sox9, Sox10, Slug, and Twist. Interestingly, the expression of these neural crest markers could be rescued by RhoU expression. In contrast, RhoV was not able to rescue the neural crest cell migration defects seen in RhoU-deficient embryos [39]. Together, these reports suggest that RhoU and RhoV may have distinct and partially overlapping functions in the neural crest.

## RhoU and RhoV in disease

### Cancer

Many Rho GTPases are up-regulated in tumors, including RhoU and RhoV [47]. RhoV has been shown to be highly expressed in lung adenocarcinoma (LUAD) tumors and was identified as a major predictor of poor prognosis in LUAD patients [48–50]. In A549 and PC9 lung cancer cell lines, RhoV overexpression increased cell proliferation, migration, and invasiveness [48,49]. In a model of gefitinib-resistant lung cancer (PC9-GR), RhoV knockdown was shown to restore drug-induced apoptosis [48]. RhoV may also promote metastasis in lung cancer. Overexpression of RhoV in A549 cells was also shown to induce markers of EMT, including increased expression of Snail, Slug, and N-cadherin coupled with decreased expression of E-cadherin, while RhoV silencing suppressed EMT markers [49]. When these RhoV-deficient A549 cells were injected into nude mice, they produced significantly fewer metastases than control cells.

RhoV has also been identified as overexpressed in triple-negative breast cancer (TNBC), and its expression is correlated with metastasis and poor survival [34]. In various breast cancer cell lines, expression of a constitutively active RhoV mutant (G40V) increased cell migration through a transwell assay while RhoV knockdown suppressed transwell migration, suggesting that RhoV may promote breast cancer invasiveness. These effects were dependent on EGFR signaling via binding of Grb2 to the SH3 domain of RhoV.

RhoU has also been implicated in several cancers including prostate cancer [51], breast cancer [30], and T-cell acute lymphoblastic leukemia (T-ALL) [52]. For T-ALL, RhoU was found to be up-regulated in examined patient samples, and its expression was correlated with activated Notch signaling, which is often mutated in T-ALL. This study also demonstrated that RhoU could promote cell migration, adhesion to fibronectin, and F-actin content in cell line models of T-ALL.

Many prostate cancers exhibit overexpression of fatty acid synthase (FASN) and corresponding dysregulation of protein palmitoylation [53]. In a prostate cancer cell line, palmitoylation of RhoU was shown to be especially sensitive to FASN levels even though the expression of total RhoU was unaffected [51]. In these cells, FASN-dependent palmitoylation of RhoU promoted phosphorylation of the focal adhesion protein paxillin, leading to increased cell adhesion turnover and cell migration. Interestingly, a very similar mechanism may operate in breast cancer cells. In MDA-MB-231 cells, RhoU was shown to promote cell migration, focal adhesion disassembly, and phosphorylation of paxillin in a PAK4-dependent manner [30]. Interestingly, PAK4 was also required in these cells to inhibit RhoU degradation.

As described above, many small GTPases including RhoU and RhoV are overexpressed in tumors, suggesting these proteins function as protooncogenes. In contrast, RhoU was reported to be down-regulated in colorectal cancer. Loss of RhoU in a mouse model resulted in hyperplasia of the gut epithelium due to decreased apoptosis and increased proliferation, and a similar result was observed in cultured DLD-1 cells [54]. These results intriguingly suggest that RhoU may possess tumor suppressor activity under specific contexts such as in the gut. Given that Wnt/ $\beta$ -catenin signaling is a major driver of colorectal tumors [55] and that RhoU is known to be Wnt responsive [13,42,43], it will be interesting to determine if RhoU interacts with the Wnt signaling pathway to suppress or enable tumor formation.



**Table 1. RhoUV functions during development**

|      | Organism, cell type           | Function                                                                                                                                  | References |
|------|-------------------------------|-------------------------------------------------------------------------------------------------------------------------------------------|------------|
| RhoU | Zebrafish, cardiomyocytes     | Regulates localization of adhesion proteins, N-cadherin and Alcama. Regulates cardiac looping and formation of the atrioventricular canal | [26]       |
|      | Mice, foregut epithelium      | Facilitates endoderm differentiation. Regulates cytoskeletal organization and epithelial architecture                                     | [44]       |
|      | <i>Xenopus</i> , neural crest | Induces lamellipodial protrusion and cell migration                                                                                       | [39]       |
| RhoV | Zebrafish, EVL                | Regulates localization of E-cadherin and $\beta$ -catenin at cellular junctions                                                           | [25]       |
|      | <i>Xenopus</i> , neural crest | Induces expression of neural crest markers Sox 9, Sox10, Slug, Twist                                                                      | [40]       |

## Viral infection

Many Rho GTPases have been shown to be involved in the process of viral infection, primarily by promoting cytoskeleton rearrangements that make the cell more accessible for viral entry [56,57]. In a cell culture-based screen, RhoV was identified as a host factor that enhanced the entry of a subset of flaviviruses including Zika virus and dengue virus [58]. Because flaviviruses enter cells via receptor-mediated endocytosis and RhoV is known to localize to endosomal membranes [21], the authors investigated the effects of mutating the palmitoylation motif on RhoV (C234S). While some reduction in viral entry was observed, it was not consistent across experimental replicates. However, expression of GTPase-defective, constitutively GTP-bound RhoV mutant (G40V) did significantly reduce viral entry, suggesting that complete GTP/GDP cycling is necessary for RhoV to facilitate flavivirus infection.

## Conclusion

Although not as extensively studied as RhoA, Rac1, and Cdc42, RhoUV GTPases are increasingly recognized as having important and unique functions. They appear to be especially critical for embryonic development (summarized in Table 1) and cancer progression (Table 2). When taken as a whole, published studies of RhoUV proteins have converged on a few key cellular processes regulated by these GTPases. One of these processes is the regulation of cell adhesion. In multiple cell types, RhoUV proteins have been demonstrated to regulate cell–cell adhesion and the localization of Cadherin receptors [25,26,49]. RhoUV proteins are also implicated in cell–matrix adhesion [52] and the regulation of the focal adhesion proteins paxillin [30,51]. Notably, paxillin can

**Table 2. RhoUV functions in cancer**

|      | Disease                             | Function                                                                                                                                                                              | References |
|------|-------------------------------------|---------------------------------------------------------------------------------------------------------------------------------------------------------------------------------------|------------|
| RhoU | Colorectal cancer                   | Down-regulated in tumors<br>Maintains epithelial homeostasis by regulating apoptosis and proliferation                                                                                | [54]       |
|      | Breast cancer                       | Overexpressed in tumors. Promotes cell migration and focal adhesion turnover                                                                                                          | [30]       |
|      | Prostate cancer                     | Overexpressed in tumors. Promotes cell migration and focal adhesion turnover                                                                                                          | [51]       |
|      | T-cell acute lymphoblastic leukemia | Overexpressed in cancerous cells. Promotes cells migration, adhesion and F-actin content.                                                                                             | [52]       |
| RhoV | Lung adenocarcinoma cancer          | Overexpressed in tumors. Promotes cell migration and proliferation. Promotes metastasis and EMT markers, e.g. down-regulation of E-cadherin, up-regulation of N-cadherin, Snail, Slug | [48,49]    |
|      | Triple negative breast cancer       | Overexpressed in tumors. Promotes migration and invasion                                                                                                                              | [34]       |

regulate the stability of both integrin-dependent focal adhesions [27] and Cadherin-based adherens junctions [59], suggesting that RhoUV signaling may play a central role in coordinating cell–cell and cell–matrix adhesion.

Several lines of evidence point to a role for RhoUV proteins in regulating transitions between epithelial and mesenchymal cell states. As noted above, both RhoU and RhoV can regulate the levels and localization of E- and N-cadherin, key markers of epithelial and mesenchymal states, respectively [25,26,49]. RhoU and RhoV also play important roles in neural crest cells [39,40], which prominently undergo EMT during their development. Both RhoU and RhoV are associated with cancer metastasis [30,34,48,49], which often involves an EMT step as cells escape the primary tumor. Finally, RhoV has been shown to regulate the expression of the EMT transcription factors Slug and Twist in neural crest cells [40] and Snail, Slug, and Twist cancer cells [34]. The contribution of RhoU and RhoV to EMT/MET is a potentially impactful area for future investigation.

One underappreciated aspect of RhoUV proteins may be their specialized functions. Although similar in structure, RhoU and RhoV exhibit obvious differences in their spatiotemporal expression patterns, especially during development. RhoV expression is often more restricted in terms of developmental time points and cell and tissue types while RhoU is often expressed more broadly; this pattern is seen, for example, in the developing chick gastrointestinal tract [37]. This difference in expression pattern suggests that RhoV may be more specialized in function than RhoU. Consistent with this idea, RhoU was able to rescue RhoV loss of function in neural crest cells [40], but RhoV could not substitute for the loss of RhoU [39]. In the future, it will be interesting to determine if this functional specialization broadly applies to other contexts and cell types and, more importantly, to identify the mechanisms underlying the differences in RhoU versus RhoV function.

## Perspectives

- RhoUV GTPases are relatively understudied but may have important and physiologically relevant functions that are distinct from classical Rho GTPases.
- RhoUV GTPases possess several distinct structural and functional properties, including divergent N- and C-terminal regions and increased GDP/GTP cycling. These atypical Rho GTPases have been shown to regulate the development of several different organ and tissue types and are implicated in diseases including several types of cancer and susceptibility to viral infection.
- Future work on RhoUV proteins should focus on in-depth characterization of the mechanisms underlying their function, especially in terms of coordinating cell adhesion and EMTs, as well as delineating the distinct functions of RhoU versus RhoV.

## Competing Interests

The authors declare that there are no competing interests associated with the manuscript.

## Funding

This work was supported by grants from the National Institutes of Health (NIH) [R03DK106358 and R21HD107313] to S.W. L.S. received support from the NSF-CREST: Center for Cellular and Biomolecular Machines at the University of California, Merced [NSF-HRD-1547848].

## Open Access

Open access for this article was enabled by the participation of University of California in an all-inclusive *Read & Publish* agreement with Portland Press and the Biochemical Society under a transformative agreement with UC.

## Abbreviations

EGFR, epidermal growth factor receptor; EMT, epithelial-to-mesenchymal transition; ES, embryonic stem; FASN, fatty acid synthase; GAPs, GTPase-activating proteins; GDIs, Guanine dissociation inhibitors; GEFs, Guanine

nucleotide exchange factors; hpf, hours post-fertilization; PAK, p21-activated kinase; T-ALL, T-cell acute lymphoblastic leukemia.

## References

- 1 Lawson, C.D. and Ridley, A.J. (2018) Rho GTPase signaling complexes in cell migration and invasion. *J. Cell Biol.* **217**, 447–457 <https://doi.org/10.1083/jcb.201612069>
- 2 Freeman, J.L., Abo, A. and Lambeth, J.D. (1996) Rac “insert region” is a novel effector region that is implicated in the activation of NADPH oxidase, but not PAK65. *J. Biol. Chem.* **271**, 19794–19801 <https://doi.org/10.1074/jbc.271.33.19794>
- 3 Mosaddeghzadeh, N. and Ahmadian, M.R. (2021) The RHO family GTPases: mechanisms of regulation and signaling. *Cells* **10**, 1831 <https://doi.org/10.3390/cells10071831>
- 4 Rossman, K.L., Der, C.J. and Sondek, J. (2005) GEF means go: turning on RHO GTPases with guanine nucleotide-exchange factors. *Nat. Rev. Mol. Cell Biol.* **6**, 167–180 <https://doi.org/10.1038/nrm1587>
- 5 Moon, S.Y. and Zheng, Y. (2003) Rho GTPase-activating proteins in cell regulation. *Trends Cell Biol.* **13**, 13–22 [https://doi.org/10.1016/s0962-8924\(02\)00004-1](https://doi.org/10.1016/s0962-8924(02)00004-1)
- 6 Mitin, N., Roberts, P.J., Chenette, E.J. and Der, C.J. (2012) Posttranslational lipid modification of Rho family small GTPases. *Methods Mol. Biol.* **827**, 87–95 [https://doi.org/10.1007/978-1-61779-442-1\\_6](https://doi.org/10.1007/978-1-61779-442-1_6)
- 7 Garcia-Mata, R., Boulter, E. and Burridge, K. (2011) The “invisible hand”: regulation of RHO GTPases by RHO GDI. *Nat. Rev. Mol. Cell Biol.* **12**, 493–504 <https://doi.org/10.1038/nrm3153>
- 8 Fukumoto, Y., Kaibuchi, K., Hori, Y., Fujioka, H., Araki, S., Ueda, T. et al. (1990) Molecular cloning and characterization of a novel type of regulatory protein (GDI) for the rho proteins, ras p21-like small GTP-binding proteins. *Oncogene* **5**, 1321–1328
- 9 Leonard, D., Hart, M.J., Platko, J.V., Eva, A., Henzel, W., Evans, T. et al. (1992) The identification and characterization of a GDP-dissociation inhibitor (GDI) for the CDC42Hs protein. *J. Biol. Chem.* **267**, 22860–22868 [https://doi.org/10.1016/S0021-9258\(18\)50026-0](https://doi.org/10.1016/S0021-9258(18)50026-0)
- 10 Golding, A.E., Visco, I., Bieling, P. and Bement, W.M. (2019) Extraction of active RhoGTPases by RhoGDI regulates spatiotemporal patterning of RhoGTPases. *eLife* **8**, e50471 <https://doi.org/10.7554/eLife.50471>
- 11 Boureux, A., Vignal, E., Faure, S. and Fort, P. (2007) Evolution of the Rho family of ras-like GTPases in eukaryotes. *Mol. Biol. Evol.* **24**, 203–216 <https://doi.org/10.1093/molbev/msl145>
- 12 Hodge, R.G. and Ridley, A.J. (2020) Regulation and functions of RhoU and RhoV. *Small GTPases* **11**, 8–15 <https://doi.org/10.1080/21541248.2017.1362495>
- 13 Tao, W., Pennica, D., Xu, L., Kalejta, R.F. and Levine, A.J. (2001) Wrch-1, a novel member of the Rho gene family that is regulated by Wnt-1. *Genes Dev.* **15**, 1796–1807 <https://doi.org/10.1101/gad.894301>
- 14 Aronheim, A., Broder, Y.C., Cohen, A., Fritsch, A., Belisle, B. and Abo, A. (1998) Chp, a homologue of the GTPase Cdc42Hs, activates the JNK pathway and is implicated in reorganizing the actin cytoskeleton. *Curr. Biol.* **8**, 1125–1128 [https://doi.org/10.1016/S0960-9822\(98\)70468-3](https://doi.org/10.1016/S0960-9822(98)70468-3)
- 15 Saras, J., Wollberg, P. and Aspenström, P. (2004) Wrch1 is a GTPase-deficient Cdc42-like protein with unusual binding characteristics and cellular effects. *Exp. Cell Res.* **299**, 356–369 <https://doi.org/10.1016/j.yexcr.2004.05.029>
- 16 Shutes, A., Berzat, A.C., Cox, A.D. and Der, C.J. (2004) Atypical mechanism of regulation of the Wrch-1 Rho family small GTPase. *Curr. Biol.* **14**, 2052–2056 <https://doi.org/10.1016/j.cub.2004.11.011>
- 17 Zhang, J.-S., Koenig, A., Young, C. and Billadeau, D.D. (2011) GRB2 couples RhoU to epidermal growth factor receptor signaling and cell migration. *Mol. Biol. Cell* **22**, 2119–2130 <https://doi.org/10.1091/mbc.E10-12-0969>
- 18 Aspenström, P. (2022) The role of fast-cycling atypical RHO GTPases in cancer. *Cancers* **14**, 1961 <https://doi.org/10.3390/cancers14081961>
- 19 Reinstein, J., Schlichting, I., Frech, M., Goody, R.S. and Wittinghofer, A. (1991) P21 with a phenylalanine 28→leucine mutation reacts normally with the GTPase activating protein GAP but nevertheless has transforming properties. *J. Biol. Chem.* **266**, 17700–17706 [https://doi.org/10.1016/S0021-9258\(19\)47428-0](https://doi.org/10.1016/S0021-9258(19)47428-0)
- 20 Berzat, A.C., Buss, J.E., Chenette, E.J., Weinbaum, C.A., Shutes, A., Der, C.J. et al. (2005) Transforming activity of the Rho family GTPase, Wrch-1, a Wnt-regulated Cdc42 homolog, is dependent on a novel carboxyl-terminal palmitoylation motif. *J. Biol. Chem.* **280**, 33055–33065 <https://doi.org/10.1074/jbc.M507362200>
- 21 Chenette, E.J., Abo, A. and Der, C.J. (2005) Critical and distinct roles of amino- and carboxyl-terminal sequences in regulation of the biological activity of the Chp atypical Rho GTPase. *J. Biol. Chem.* **280**, 13784–13792 <https://doi.org/10.1074/jbc.M411300200>
- 22 Alan, J.K., Berzat, A.C., Dewar, B.J., Graves, L.M. and Cox, A.D. (2010) Regulation of the Rho family small GTPase Wrch-1/RhoU by C-terminal tyrosine phosphorylation requires Src. *Mol. Cell Biol.* **30**, 4324–4338 <https://doi.org/10.1128/MCB.01646-09>
- 23 Chenette, E.J., Mitin, N.Y. and Der, C.J. (2006) Multiple sequence elements facilitate Chp Rho GTPase subcellular location, membrane association, and transforming activity. *Mol. Biol. Cell* **17**, 3108–3121 <https://doi.org/10.1091/mbc.e05-09-0896>
- 24 Ahmad Mokhtar, A.M.B., Ahmed, S.B.M., Darling, N.J., Harris, M., Mott, H.R. and Owen, D. (2021) A complete survey of RhoGDI targets reveals novel interactions with atypical small GTPases. *Biochemistry* **60**, 1533–1551 <https://doi.org/10.1021/acs.biochem.1c00120>
- 25 Tay, H.G., Ng, Y.W. and Manser, E. (2010) A vertebrate-specific Chp-PAK-PIX pathway maintains E-cadherin at adherens junctions during zebrafish epiboly. *PLoS One* **5**, e10125 <https://doi.org/10.1371/journal.pone.0010125>
- 26 Dickover, M., Hegarty, J.M., Ly, K., Lopez, D., Yang, H., Zhang, R. et al. (2014) The atypical Rho GTPase, RhoU, regulates cell-adhesion molecules during cardiac morphogenesis. *Dev. Biol.* **389**, 182–191 <https://doi.org/10.1016/j.ydbio.2014.02.014>
- 27 Turner, C.E. (2000) Paxillin interactions. *J. Cell Sci.* **113**, 4139–4140 <https://doi.org/10.1242/jcs.113.23.4139>
- 28 Aspenström, P., Fransson, A. and Saras, J. (2004) Rho GTPases have diverse effects on the organization of the actin filament system. *Biochem. J.* **377**, 327–337 <https://doi.org/10.1042/BJ20031041>
- 29 Weisz Hubsman, M., Volinsky, N., Manser, E., Yablonski, D. and Aronheim, A. (2007) Autophosphorylation-dependent degradation of Pak1, triggered by the Rho-family GTPase, Chp. *Biochem. J.* **404**, 487–497 <https://doi.org/10.1042/BJ20061696>
- 30 Dart, A.E., Box, G.M., Court, W., Gale, M.E., Brown, J.P., Pinder, S.E. et al. (2015) PAK4 promotes kinase-independent stabilization of RhoU to modulate cell adhesion. *J. Cell Biol.* **211**, 863–879 <https://doi.org/10.1083/jcb.201501072>



- 31 Shepelev, M.V. and Korobko, I.V. (2012) Pak6 protein kinase is a novel effector of an atypical Rho family GTPase Chp/RhoV. *Biochemistry* **77**, 26–32 <https://doi.org/10.1134/S0006297912010038>
- 32 Ory, S., Brazier, H. and Blangy, A. (2007) Identification of a bipartite focal adhesion localization signal in RhoU/Wrch-1, a Rho family GTPase that regulates cell adhesion and migration. *Biol. Cell* **99**, 701–716 <https://doi.org/10.1042/BC20070058>
- 33 Shepelev, M.V., Chernoff, J. and Korobko, I.V. (2011) Rho family GTPase Chp/RhoV induces PC12 apoptotic cell death via JNK activation. *Small GTPases* **2**, 17–26 <https://doi.org/10.4161/sgtp.2.1.15229>
- 34 Jin, M.-L., Gong, Y., Ji, P., Hu, X. and Shao, Z.-M. (2023) In vivo CRISPR screens identify RhoV as a pro-metastasis factor of triple-negative breast cancer. *Cancer Sci.* **114**, 2375–2385 <https://doi.org/10.1111/cas.15783>
- 35 Ruusala, A. and Aspenström, P. (2008) The atypical Rho GTPase Wrch1 collaborates with the nonreceptor tyrosine kinases Pyk2 and Src in regulating cytoskeletal dynamics. *Mol. Cell. Biol.* **28**, 1802–1814 <https://doi.org/10.1128/MCB.00201-07>
- 36 Brady, D.C., Alan, J.K., Madigan, J.P., Fanning, A.S. and Cox, A.D. (2009) The transforming Rho family GTPase Wrch-1 disrupts epithelial cell tight junctions and epithelial morphogenesis. *Mol. Cell. Biol.* **29**, 1035–1049 <https://doi.org/10.1128/MCB.00336-08>
- 37 Notarnicola, C., Le Guen, L., Fort, P., Faure, S. and de Santa Barbara, P. (2008) Dynamic expression patterns of RhoV/Chp and RhoU/Wrch during chicken embryonic development. *Dev. Dyn.* **237**, 1165–1171 <https://doi.org/10.1002/dvdy.21507>
- 38 Chen, J.-A., Voigt, J., Gilchrist, M., Papalopulu, N. and Amaya, E. (2005) Identification of novel genes affecting mesoderm formation and morphogenesis through an enhanced large scale functional screen in *Xenopus*. *Mech. Dev.* **122**, 307–331 <https://doi.org/10.1016/j.mod.2004.11.008>
- 39 Fort, P., Guémar, L., Vignal, E., Morin, N., Notarnicola, C., de Santa Barbara, P. et al. (2011) Activity of the RhoU/Wrch1 GTPase is critical for cranial neural crest cell migration. *Dev. Biol.* **350**, 451–463 <https://doi.org/10.1016/j.ydbio.2010.12.011>
- 40 Guémar, L., De Santa Barbara, P., Vignal, E., Maurel, B., Fort, P. and Faure, S. (2007) The small GTPase RhoV is an essential regulator of neural crest induction in *Xenopus*. *Dev. Biol.* **310**, 113–128 <https://doi.org/10.1016/j.ydbio.2007.07.031>
- 41 Houston, D.W. (2017) Vertebrate axial patterning: from egg to asymmetry. *Adv. Exp. Med. Biol.* **953**, 209–306 [https://doi.org/10.1007/978-3-319-46095-6\\_6](https://doi.org/10.1007/978-3-319-46095-6_6)
- 42 Schiavone, D., Dewilde, S., Vallania, F., Turkson, J., Di Cunto, F. and Poli, V. (2009) The RhoU/Wrch1 Rho GTPase gene is a common transcriptional target of both the gp130/STAT3 and Wnt-1 pathways. *Biochem. J.* **421**, 283–292 <https://doi.org/10.1042/BJ20090061>
- 43 Kidd, A.R., Muñoz-Medina, V., Der, C.J., Cox, A.D. and Reiner, D.J. (2015) The *C. elegans* Chp/Wrch ortholog CHW-1 contributes to LIN-18/Ryk and LIN-17/frizzled signaling in cell polarity. *PLoS One* **10**, e0133226 <https://doi.org/10.1371/journal.pone.0133226>
- 44 Loebel, D.A.F., Studdert, J.B., Power, M., Radziewicz, T., Jones, V., Coultas, L. et al. (2011) RhoU maintains the epithelial architecture and facilitates differentiation of the foregut endoderm. *Development* **138**, 4511–4522 <https://doi.org/10.1242/dev.063867>
- 45 Piacentino, M.L., Li, Y. and Bronner, M.E. (2020) Epithelial-to-mesenchymal transition and different migration strategies as viewed from the neural crest. *Curr. Opin. Cell Biol.* **66**, 43–50 <https://doi.org/10.1016/j.ceb.2020.05.001>
- 46 García-Castro, M.I., Marcelle, C. and Bronner-Fraser, M. (2002) Ectodermal Wnt function as a neural crest inducer. *Science* **297**, 848–851 <https://doi.org/10.1126/science.1070824>
- 47 Haga, R.B. and Ridley, A.J. (2016) Rho GTPases: regulation and roles in cancer cell biology. *Small GTPases* **7**, 207–221 <https://doi.org/10.1080/21541248.2016.1232583>
- 48 Chen, H., Xia, R., Jiang, L., Zhou, Y., Xu, H., Peng, W. et al. (2021) Overexpression of RhoV promotes the progression and EGFR-TKI resistance of lung adenocarcinoma. *Front. Oncol.* **11**, 619013 <https://doi.org/10.3389/fonc.2021.619013>
- 49 Zhang, D., Jiang, Q., Ge, X., Shi, Y., Ye, T., Mi, Y. et al. (2021) RHOV promotes lung adenocarcinoma cell growth and metastasis through JNK/c-Jun pathway. *Int. J. Biol. Sci.* **17**, 2622–2632 <https://doi.org/10.7150/ijbs.59939>
- 50 Li, Q., Liu, X.-L., Jiang, N., Li, Q.-Y., Song, Y.-X., Ke, X.-X. et al. (2023) A new prognostic model for RHOV, ABCC2, and CYP4B1 to predict the prognosis and association with immune infiltration of lung adenocarcinoma. *J. Thorac. Dis.* **15**, 1919–1934 <https://doi.org/10.21037/jtd-23-265>
- 51 De Piano, M., Manuelli, V., Zadra, G., Otte, J., Edqvist, P.-H.D., Pontén, F. et al. (2020) Lipogenic signalling modulates prostate cancer cell adhesion and migration via modification of Rho GTPases. *Oncogene* **39**, 3666–3679 <https://doi.org/10.1038/s41388-020-1243-2>
- 52 Bhavsar, P.J., Infante, E., Khwaja, A. and Ridley, A.J. (2013) Analysis of Rho GTPase expression in T-ALL identifies RhoU as a target for Notch involved in T-ALL cell migration. *Oncogene* **32**, 198–208 <https://doi.org/10.1038/onc.2012.42>
- 53 Swinnen, J.V., Roskams, T., Joniau, S., Van Poppel, H., Oyen, R., Baert, L. et al. (2002) Overexpression of fatty acid synthase is an early and common event in the development of prostate cancer. *Int. J. Cancer* **98**, 19–22 <https://doi.org/10.1002/ijc.10127>
- 54 Slaymi, C., Vignal, E., Crès, G., Roux, P., Blangy, A., Raynaud, P. et al. (2019) The atypical RhoU/Wrch1 Rho GTPase controls cell proliferation and apoptosis in the gut epithelium. *Biol. Cell* **111**, 121–141 <https://doi.org/10.1111/boc.201800062>
- 55 Bian, J., Dannappel, M., Wan, C. and Firestein, R. (2020) Transcriptional regulation of Wnt/ $\beta$ -catenin pathway in colorectal cancer. *Cells* **9**, 2125 <https://doi.org/10.3390/cells9092125>
- 56 Barocchi, M.A., Masiagnani, V. and Rappuoli, R. (2005) Opinion: cell entry machines: a common theme in nature? *Nat. Rev. Microbiol.* **3**, 349–358 <https://doi.org/10.1038/nrmicro1131>
- 57 Broeke, V., Jacob, C., and Favoreel, T. and W, H. (2014) Rho'ing in and out of cells: viral interactions with Rho GTPase signaling. *Small GTPases* **5**, e28318 <https://doi.org/10.4161/sgtp.28318>
- 58 Luu, A.P., Yao, Z., Ramachandran, S., Azzopardi, S.A., Miles, L.A., Schneider, W.M. et al. (2021) A CRISPR activation screen identifies an atypical Rho GTPase that enhances Zika viral entry. *Viruses* **13**, 2113 <https://doi.org/10.3390/v13112113>
- 59 Xu, W., Alpha, K.M., Zehrbach, N.M. and Turner, C.E. (2022) Paxillin promotes breast tumor collective cell invasion through maintenance of adherens junction integrity. *Mol. Biol. Cell* **33**, ar14 <https://doi.org/10.1091/mbc.E21-09-0432>
